# Supplementary figures and images for: Keap1 governs ageing-induced protein aggregation in endothelial cells
Source: PubMed Central journal article supplement — Redox Biol. 2020 May 19;34:101572. doi: 10.1016/j.redox.2020.101572 (PMC7327977; doi:10.1016/j.redox.2020.101572), 2020-05-19

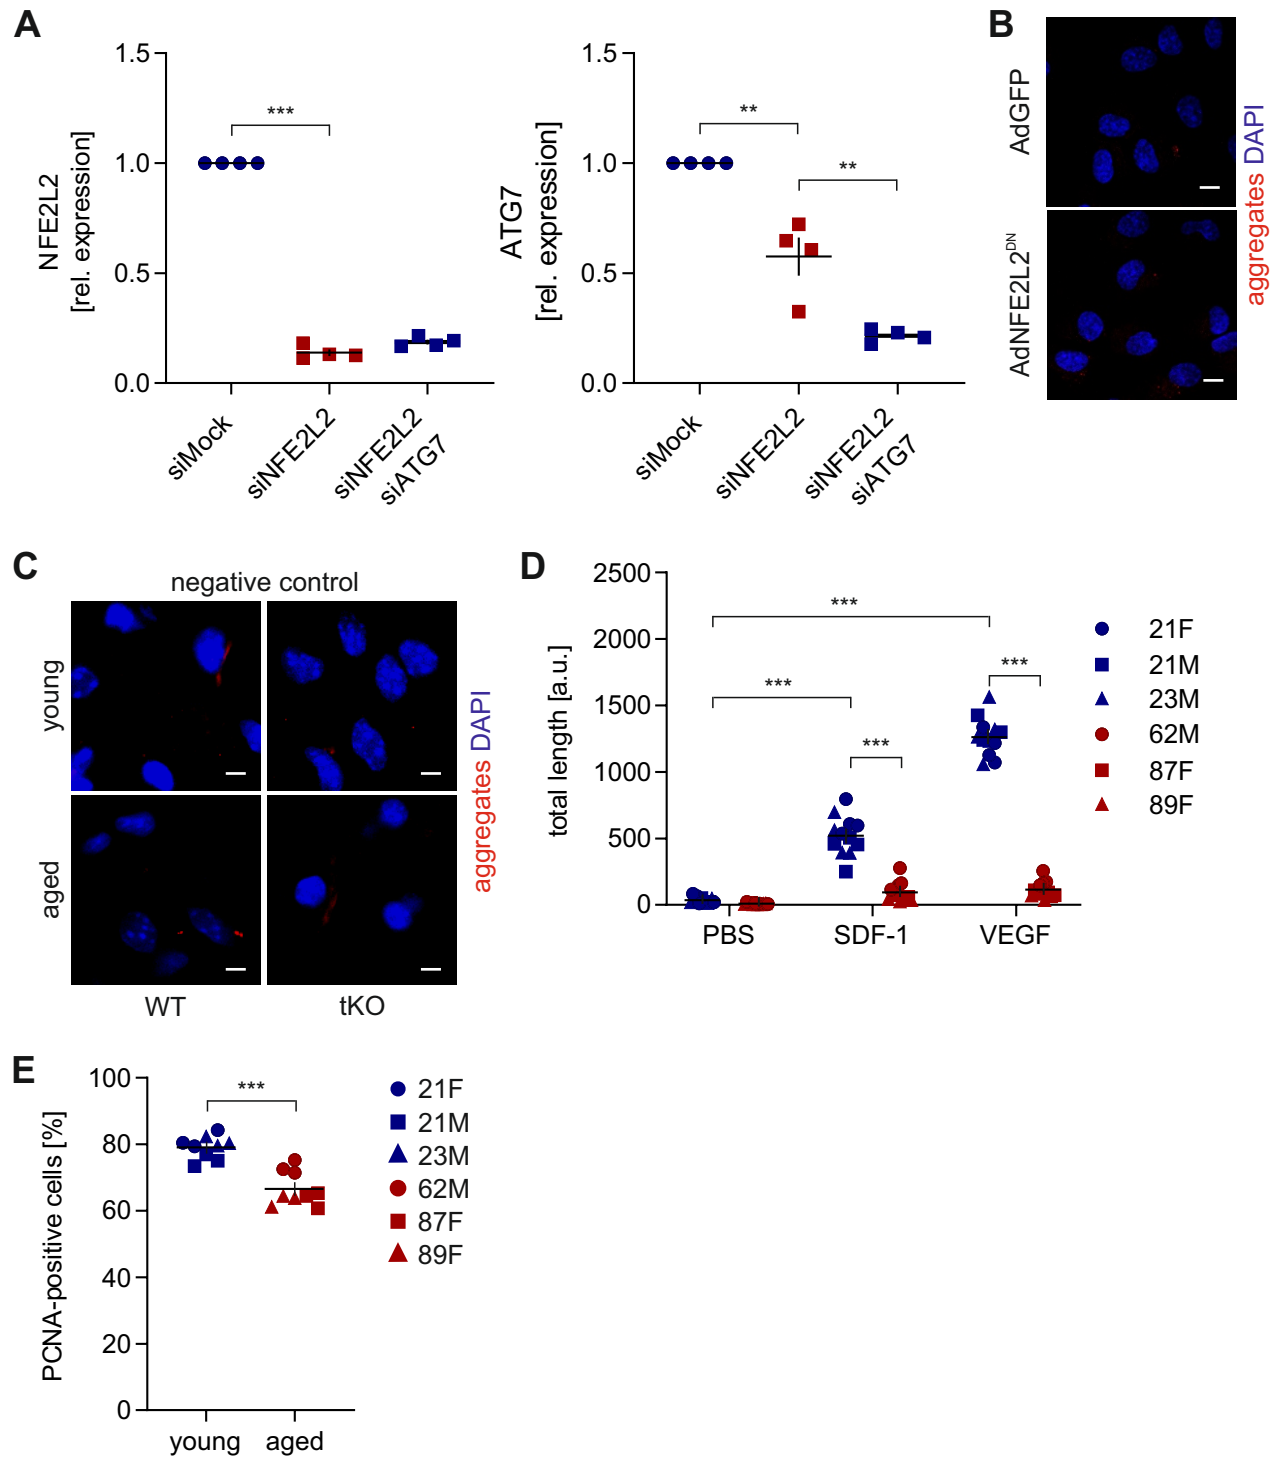

**Figure S1**

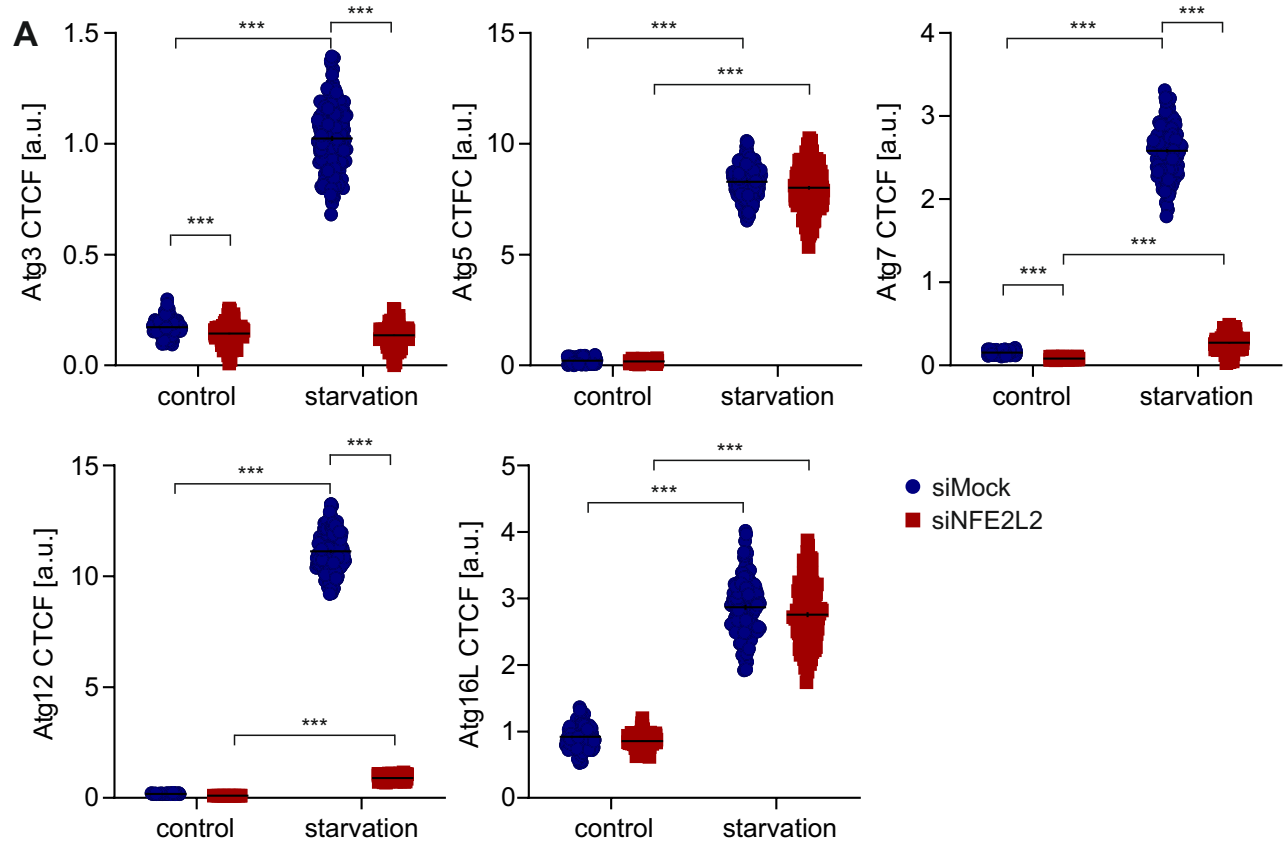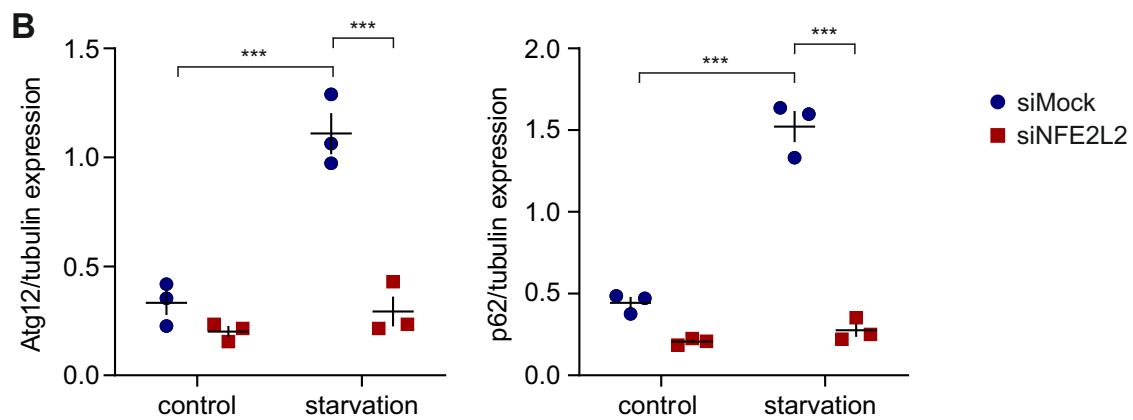

**Figure S2**

**A**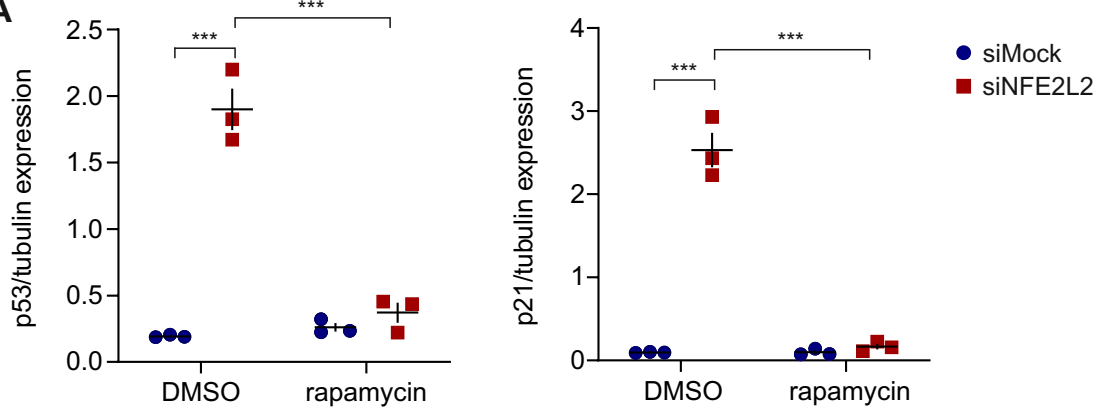**Figure S3**

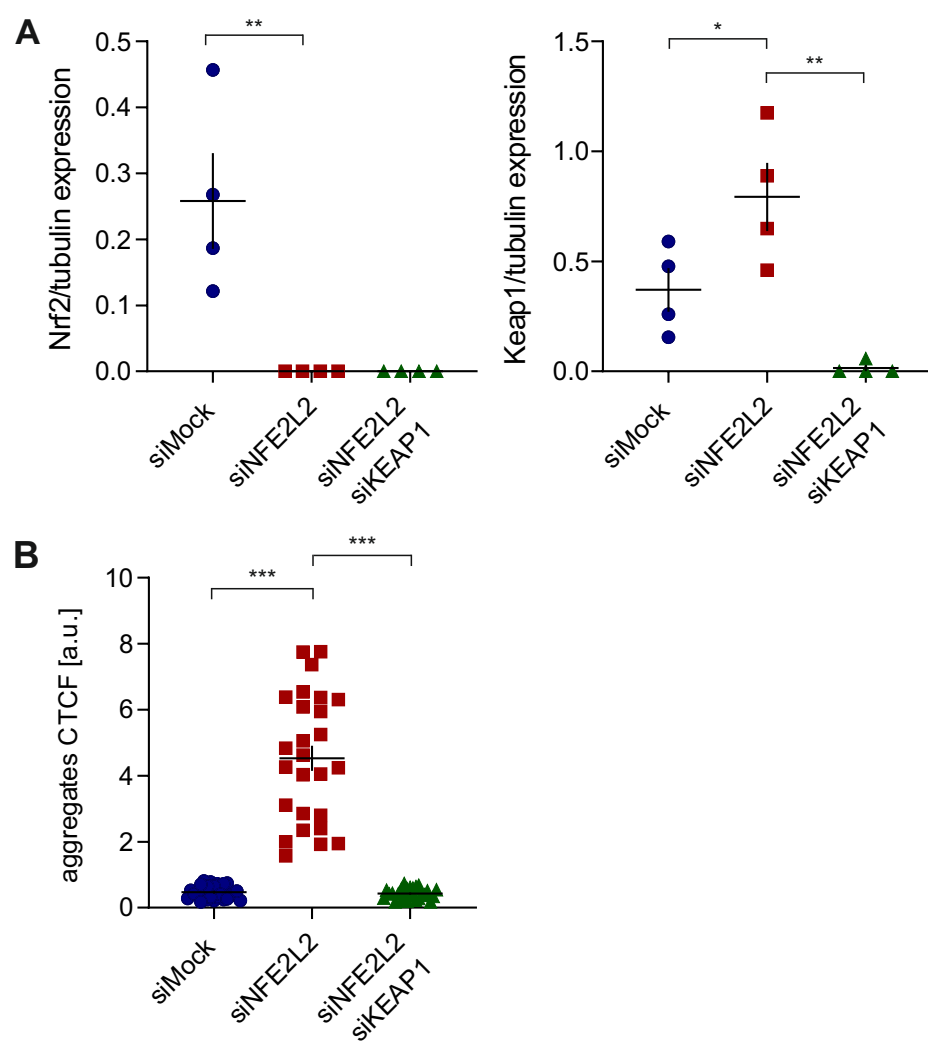

**Figure S4**

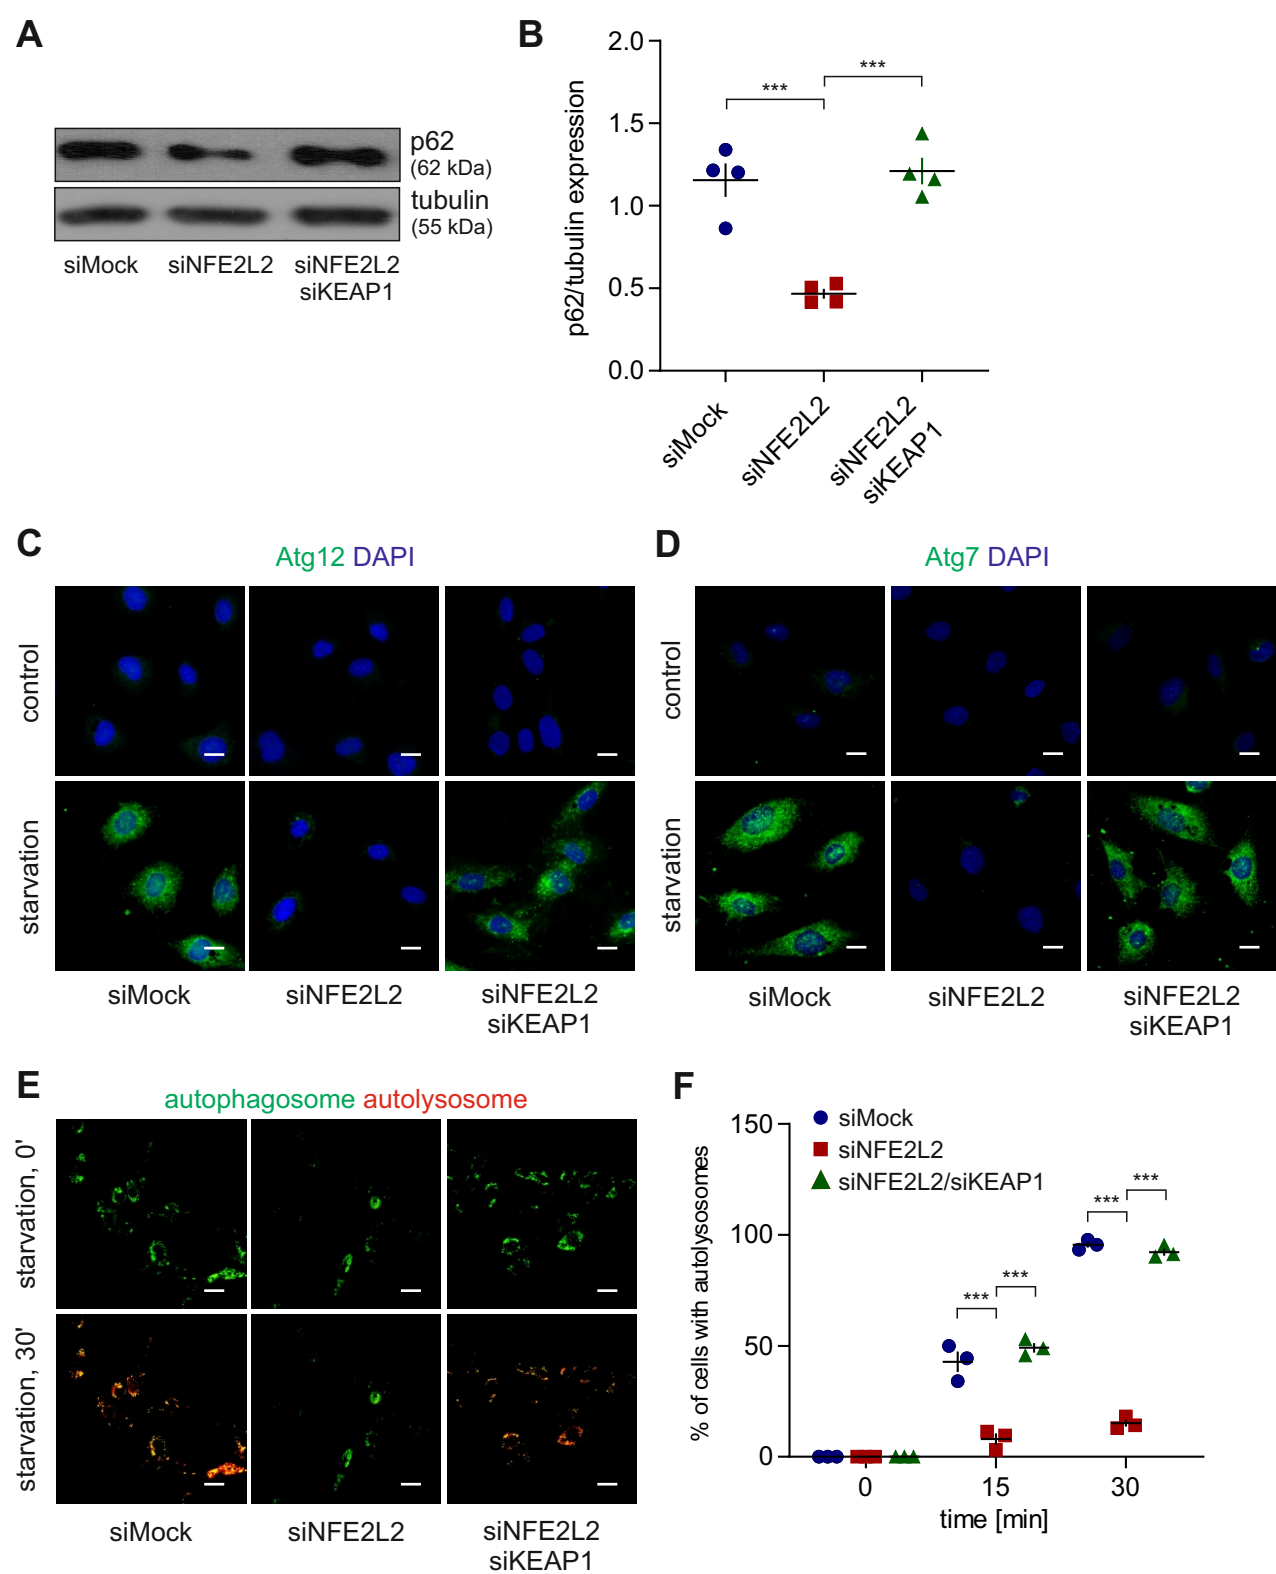

**Figure S5**

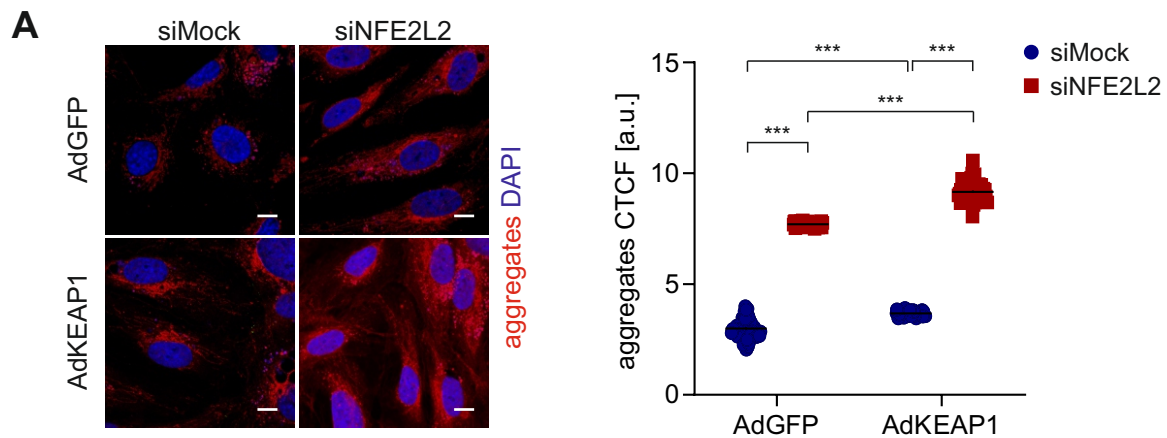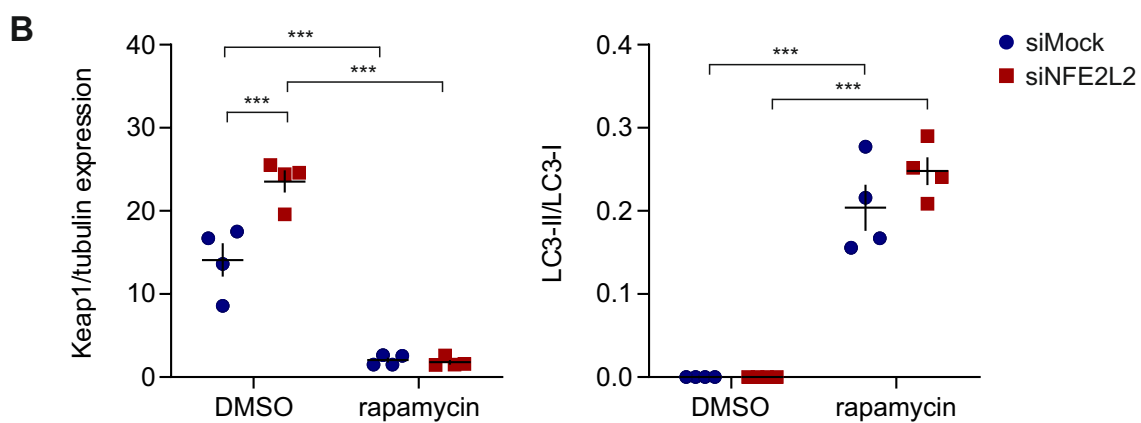

Figure S6

**A**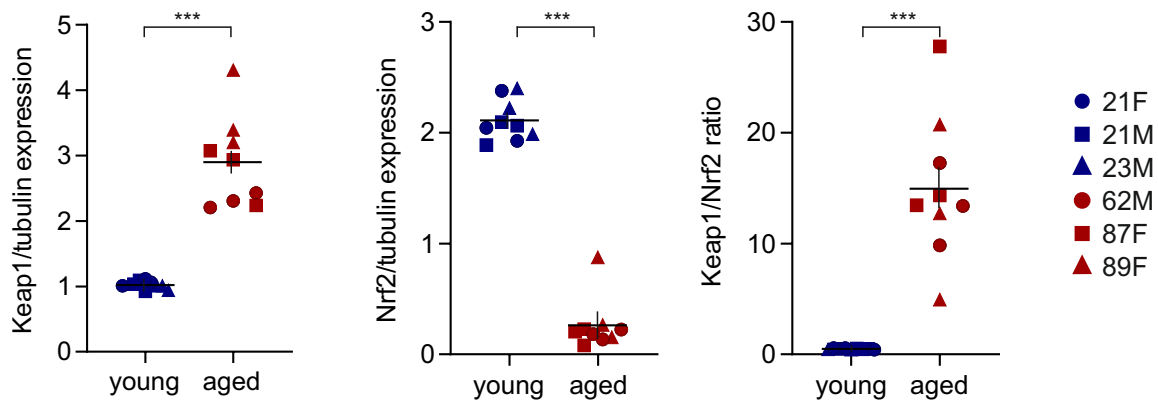**B**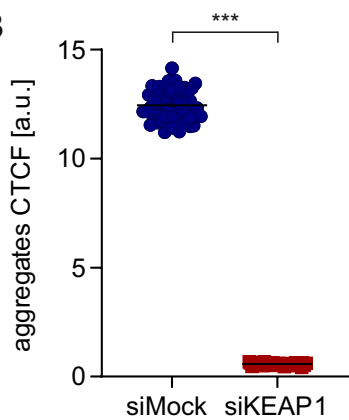**Figure S7**

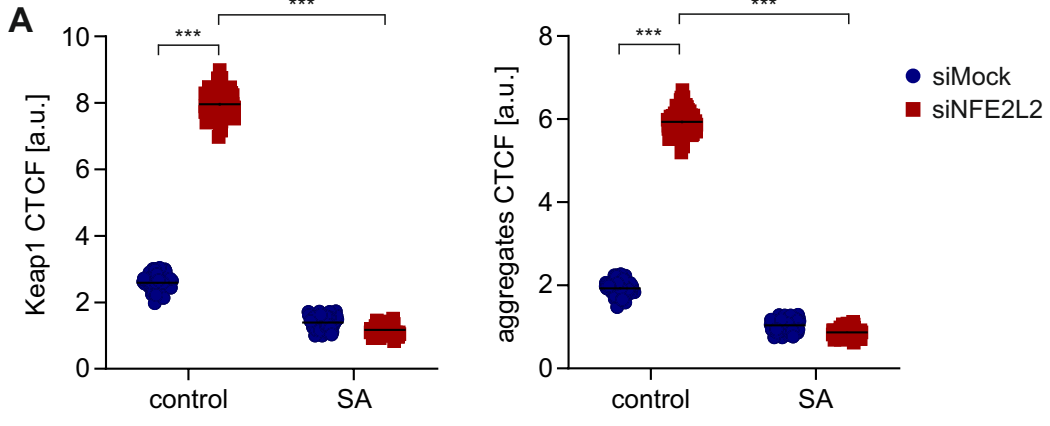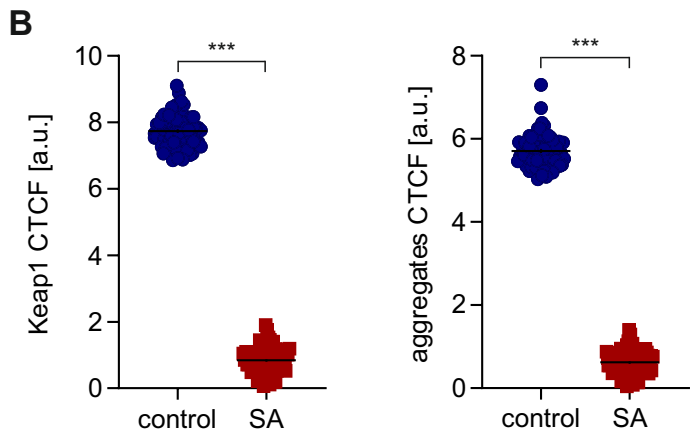

Figure S8

Supplement: mmc2.pdf [file mmc2.pdf]
